# Supplementary material for: SETD7 promotes lateral plate mesoderm formation by modulating the Wnt/β-catenin signaling pathway
Source: PubMed Central journal article supplement — iScience. 2023 May 19;26(6):106917. doi: 10.1016/j.isci.2023.106917 (PMC10291335; doi:10.1016/j.isci.2023.106917), 2023-05-19
Supplement: mmc1.pdf [file mmc1.pdf]

**Supplemental information**

***SETD7* promotes lateral plate mesoderm formation  
by modulating the Wnt/ $\beta$ -catenin signaling pathway**

**Ding Wang, Yapu Li, Changlu Xu, Hongtao Wang, Xin Huang, Xu Jin, Sirui Ren, Jie Gao, Jingyuan Tong, Jinhua Liu, Jiayi Zhou, and Lihong Shi**

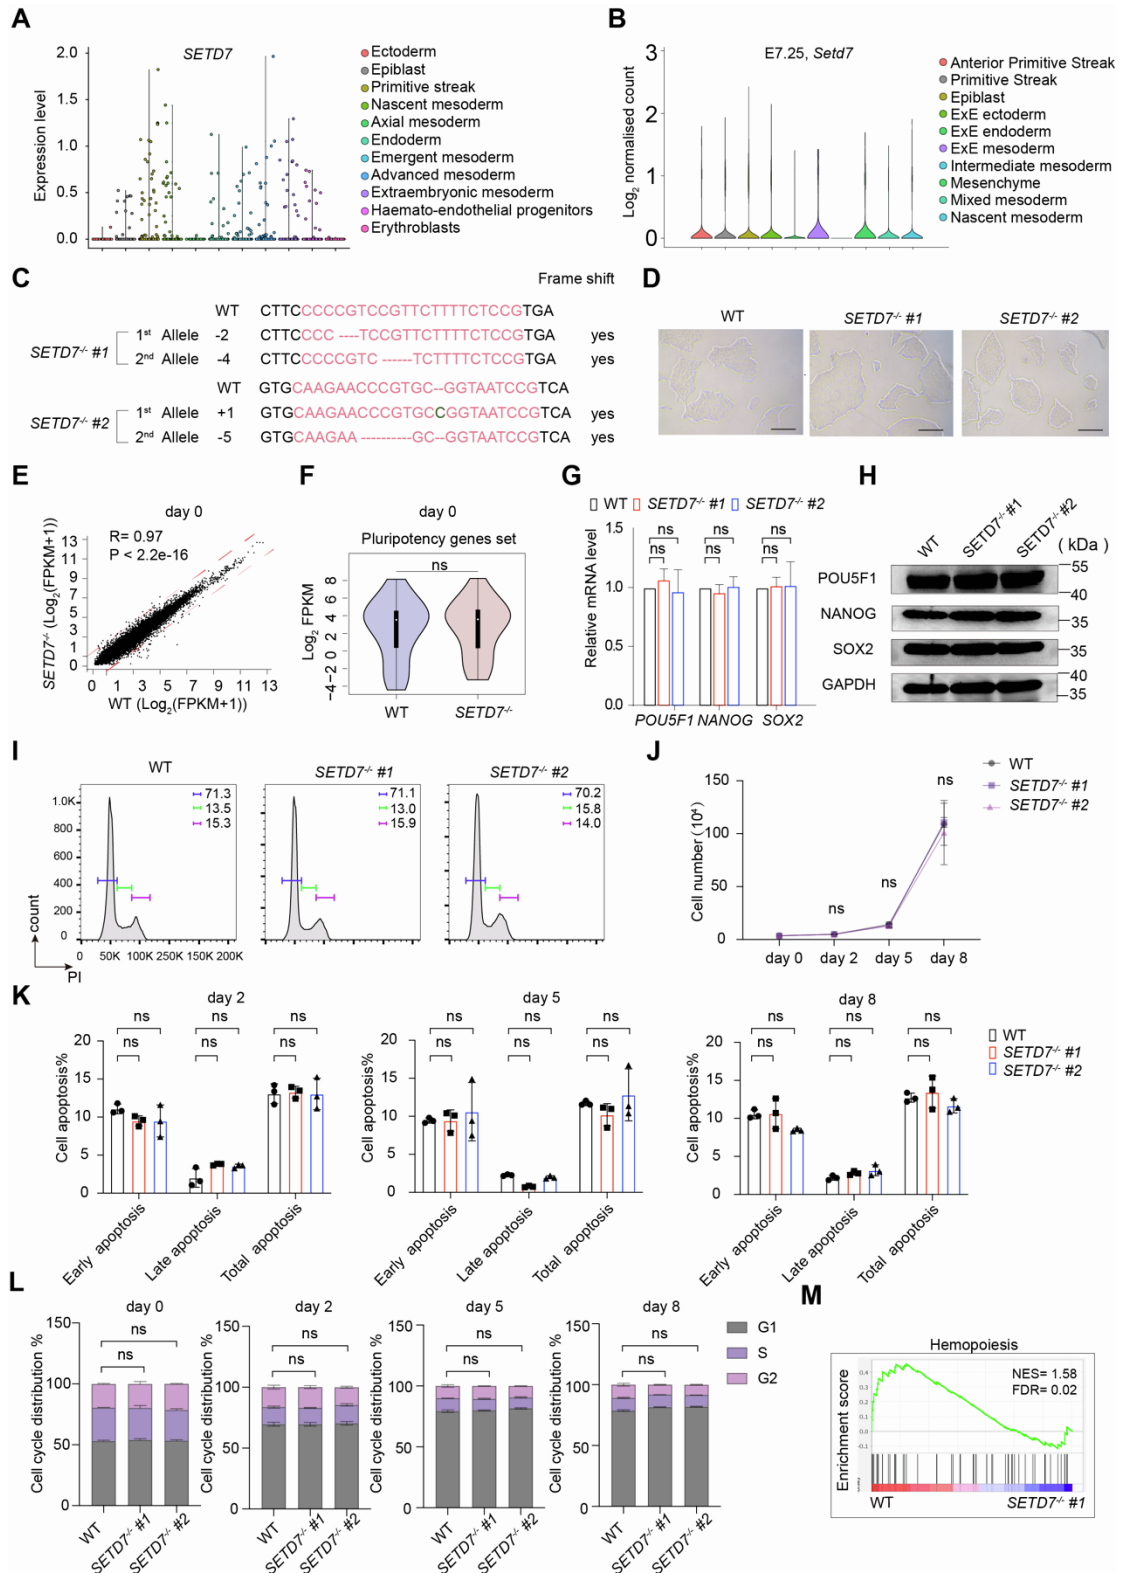

**Figure S1. *SETD7* knockout affects differentiation rather than proliferation and apoptosis. Related to Figure 2.**

(A-B) The Expression level of *SETD7* in human and murine embryonic development.

(C) DNA sequencing analysis of *SETD7*<sup>-/-</sup> #1 and #2 cell lines. Red dashed lines represent the location of base deletion, and the green character represents the location of base insertion.

(D) Cell morphology of WT, *SETD7*<sup>-/-</sup> #1 and #2 colonies of hESCs. Scale bar, 100 μm.

(E) Correlation analysis of the transcriptome between *SETD7*<sup>-/-</sup> #1 and WT cells at day 0 of hematopoietic differentiation.

(F) Violin plot showing the expression of the pluripotency gene set of *SETD7*<sup>-/-</sup> #1 and WT cells at day 0 of hematopoietic differentiation. (ns, no significance, Wilcoxon rank-sum test)

(G) RT-qPCR assay showing the relative mRNA expression of *POU5F1*, *NANOG* and *SOX2* in WT, *SETD7*<sup>-/-</sup> #1 and #2 cell lines at day 0 of hematopoietic differentiation. (n=3, ns, no significance unpaired two-tailed Student's *t*-test). Data are means ± SD.

(H) Western blotting showing the expression of *POU5F1*, *NANOG*, and *SOX2* in WT, *SETD7*<sup>-/-</sup> #1 and *SETD7*<sup>-/-</sup> #2 cell lines. GAPDH served as the loading control.

(I) Representative flow cytometry histogram plots showing PI staining of WT and *SETD7*<sup>-/-</sup> cells on day 2 of differentiation.

(J) The total cell numbers of WT and *SETD7*<sup>-/-</sup> cells during hematopoietic differentiation.

(K) Bar graphs showing apoptosis on days 0, 2, 5 and 8 of hematopoietic differentiation of WT and *SETD7*<sup>-/-</sup> cells. The number of APLNR<sup>+</sup> LPM cells, CD31<sup>+</sup>CD34<sup>+</sup> EPCs and CD43<sup>+</sup> HPCs during hematopoietic differentiation derived from WT and *SETD7*<sup>-/-</sup> cells. (n=3, ns, no significance, ordinary one-way ANOVA). Data are means ± SD.

(L) Bar graphs showing the cell cycle on days 0, 2, 5 and 8 of hematopoietic differentiation of WT and *SETD7*<sup>-/-</sup> cells. (n=3, ns, no significance, ordinary one-way ANOVA). Data are means ± SD.

(M) GSEA plots depicting the enrichment of hematopoiesis in WT and *SETD7*<sup>-/-</sup>

<sup>-/-</sup> #1 cells at day 8 of differentiation.

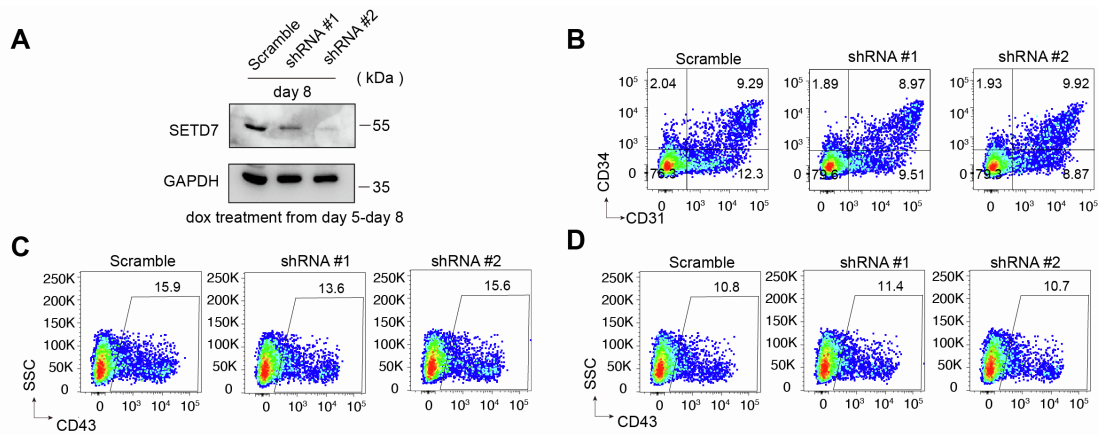

**Figure S2. Generation of EPCs and HPCs upon stage-specific *SETD7* abrogation. Related to Figure 3.**

(A) Western blot showing SETD7 protein levels after Dox induction from days 5 to 8 of differentiation. GAPDH served as the loading control.

(B-D) Representative flow cytometry plots showing the generation of CD31<sup>+</sup>CD34<sup>+</sup> EPCs (B), CD43<sup>+</sup> HPCs (C) after Dox treatment from days 2 to 8 and CD43<sup>+</sup> HPCs after Dox treatment from days 5 to 8 (D) in WT and *SETD7*-knockdown cell lines.

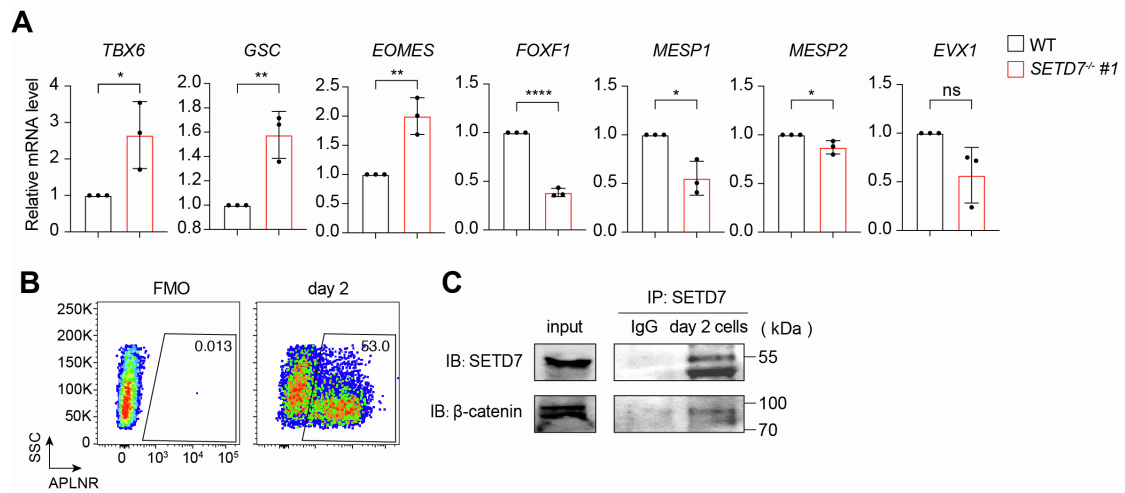

**Figure S3. SETD7 is involved in mid-primitive and anterior primitive streak progenitor formation. Related to Figure 6 and Table S3.**

(A) Relative mRNA expression of the indicated genes in WT and *SETD7*<sup>-/-</sup> cells on day 1 of hematopoietic differentiation. (n=3, \*P < 0.05, \*\*P < 0.01, \*\*\*\*P < 0.0001, ns, no significance, unpaired two-tailed Student's *t*-test). Data are means ± SD.

(B) The frequency of APLNR<sup>+</sup> cells on day 2 of hematopoietic differentiation.

(C) Coimmunoprecipitation of endogenous SETD7 and β-catenin on day 2 of hematopoietic differentiation. Ten percent of the input was used as the total protein control.

**Table S1. Primers for constructing inducible overexpression hESC lines, related to Figure 4 and STAR METHODS.**

| NAME                          | Sequence (5' to 3')                                             |
|-------------------------------|-----------------------------------------------------------------|
| SETD7-F                       | ATCGAAGCTTATGGACTACAAGGACGACGATGACAAG                           |
| SETD7-R                       | ATCGACTAGTCTTTTGCTGGGTGGCCTGGAAGGCC                             |
| CTNNB1-F                      | ATCGAAGCTTATGGACTACAAGGACGACGATGACAAGGCT<br>ACTCAAGCTGATTTGATGG |
| CTNNB1-R                      | ATCGACTAGTTTACAGGTCAGTATCAAACCAGGCC                             |
| CTNNB1-K180R <sup>mu</sup> -F | TTTCTAAAAGGGAAGCTTCCAGACACG                                     |
| CTNNB1-K180R <sup>mu</sup> -R | TAGCGTGTCTGGAAGCTTCCCTTTTAGAAA                                  |

**Table S2. Primers for SETD7 sgRNAs, related to Figure 2 and STAR METHODS.**

| NAME        | Sequence (5' to 3')      |
|-------------|--------------------------|
| sgRNA1-F-5' | CACCACGATGACGGATTACCGCAC |
| sgRNA1-R-3' | AAACGTGCGGTAATCCGTCATCGT |
| sgRNA2-F-5' | CACCACGGAGAAAAGAACGGACGG |
| sgRNA2-R-3' | AAACCCGTCCGTTCTTTTCTCCGT |

**Table S3. Primers for constructing inducible knockdown hESC lines, related to Figure 3, S2 and STAR METHODS.**

| NAME         | Sequence (5' to 3')                                        |
|--------------|------------------------------------------------------------|
| Scramble-J-F | CCGGCTTCTCCGAACGTGTCACGTTCTCGAGAACGTGACACGTTCCGAGAACTTTTTG |
| Scramble-J-R | AATTCAAAAAGTTCTCCGAACGTGTCACGTTCTCGAGAACGTGACACGTTCCGAGAAC |
| SETD7 sh1-F  | CCGGGCCAGGGTATTATTATAGAATCTCGAGATTCTATAATAATACCCTGGCTTTTTG |
| SETD7 sh1-R  | AATTCAAAAAGCCAGGGTATTATTATAGAATCTCGAGATTCTATAATAATACCCTGGC |
| SETD7 sh2-F  | CCGGCTTATGAATCAGAAAGGGTTTCTCGAGAAACCCTTTCTGATTCATAAGTTTTTG |
| SETD7 sh2-R  | AATTCAAAACTTATGAATCAGAAAGGGTTTCTCGAGAAACCCTTTCTGATTCATAAG  |

**Table S4. Primers for RT-qPCR, related to Figure 1, 6, S3 and STAR METHODS.**

| NAME     | Sequence (5' to 3')    |
|----------|------------------------|
| CTNNB1-F | GCCCTGGTGAAAATGCTTGG   |
| CTNNB1-R | CGCACTGCCATTTTAGCTCC   |
| SETD7-F  | TCATTGATGTGCCTGAGCCC   |
| SETD7-R  | GGGTGCGGATGCATTTGATG   |
| OCT4-F   | GCCCGAAAGAGAAAGCGAAC   |
| OCT4-R   | ATCTGCTGCAGTGTGGGTTT   |
| SOX2-F   | AGGATAAGTACACGCTGCCC   |
| SOX2-R   | TAAGTGTCCATGCGCTGGTT   |
| NANOG-F  | CAGAAGGCCTCAGCACCTAC   |
| NANOG-R  | ATTGGAAGGTTCCCAGTCGG   |
| HAND1-F  | CGTGAGAGCAAGCGGAAAAG   |
| HAND1-R  | CCGGTGCCTCCTTTAATCCT   |
| FOXF1-F  | CATGATGAACGGCCACTTGC   |
| FOXF1-R  | TGTCGTGGTGC GG TACT    |
| BMP4-F   | AGCGTAGCCCTAAGCATCAC   |
| BMP4-R   | AGTCATTCCAGCCACATCG    |
| MESP1-F  | CGAGTCCTGGATGCTCTCTG   |
| MESP1-R  | ATGAGTCTGGGGACGAGACG   |
| DUSP6-F  | TTCTACCTGGAAGATGAAGCCC |
| DUSP6-R  | AGGCATCGTTCATCGACAGA   |
| MSGN1-F  | CTGCACACCCTCCGGAATTA   |
| MSGN1-R  | AGGAGGTCTGTGAGTTCCCC   |
| TBX6-F   | GAGGCCCGCTACTTGTTTCT   |
| TBX6-R   | CAGGAGAGTCGGGGTGAATG   |
| EOMES-F  | TCCTTTCACCCAACAGAGC    |
| EOMES-R  | TTTGTTGGTCCCAGGTTGCT   |
| GSC-F    | AACGCGGAGAAGTGGAACAA   |
| GSC-R    | AGCTGTCCGAGTCCAAATCG   |
| MESP2-F  | ACTGCCCCAAGATACAGTCG   |
| MESP2-R  | GGGTGGCGTCCAAAGAGAC    |
| EVX1-F   | TACCAGCACAGCAAAGGGTC   |
| EVX1-R   | GGTAACGACGCATCTGGTCA   |
